# Supplementary material
Source: PubMed Central journal article supplement (PMC7610808)
Supplement: EMS124177-supplement-supplemental_materials.pdf [file EMS124177-supplement-supplemental_materials.pdf]

## **Supplementary methods**

### **Human IFN- $\gamma$ ELISpot assays**

IFN- $\gamma$  ELISpot assays were performed directly *ex vivo* on freshly isolated PBMCs plated in triplicate at  $2 \times 10^5$  PBMCs per well. A positive cut off was previously defined (12,15) as 48 SFCs/ $10^6$  PBMCs (mean + 3 SDs) calculated from 74 healthy HCV seronegative volunteers. In addition, a response was only considered positive if this exceeded 3 $\times$  background in the DMSO control wells. Background controls wells typically contained zero to four SFCs/ $2 \times 10^5$  PBMCs.

Concanavalin A (Sigma), FEC (mixed HLA class-I restricted peptides from influenza, Epstein-Barr virus and Cytomegalovirus) (BEI resources) and CMV lysate (Virusys Corp) were included as internal positive controls. Total NS response was calculated by summing responses to all positive pools (NS3p–NS5B II) and corrected for background. Cells were counted using a Muse cell analyzer (Merck Millipore) as previously described (12,15).

### **Mouse IFN- $\gamma$ ELISpot**

IFN- $\gamma$ -ELISpot assay with mouse splenocytes was performed exactly as described (8) using antibody pairs obtained from U-CyTech (Utrecht, the Netherlands) and overnight stimulation with immunodominant OVA peptide 257-264 (SIINFEKL) at a final concentration of 2 $\mu$ g/ml.

### **Human Intracellular cytokine staining (ICS)**

ICS was performed on fresh PBMC after 12 hours resting at 37°C in R10 medium. Briefly, PBMC were stimulated using peptides in pool combinations (F+G=NS3, H+I=NS4-NS5A, L+M=NS5B 1 $\mu$ g/ml) or unstimulated (controlled for DMSO) or phorbol 12-myristate 13-acetate (PMA)/ionomycin (50 and 500 ng/ml respectively) for 6hours at 37°C in the presence of GolgiPlug (BD), Golgi Stop (Biolegend) and anti-CD107a. Cells were stained with aqua amine reactive viability dye, were fixed using BD cytofix/cytoperm solution according to manufacturer's instructions and stained with the antibodies listed in table S8.

Cells at least 10,000 viable singlet CD3<sup>+</sup> CD4<sup>+</sup> or CD3<sup>+</sup> CD8<sup>+</sup> lymphocyte events were acquired using a BD LSRII-FACS DIVA. All ICS data are corrected for background. Analysis of polyfunctionality was performed using Pestle and SPICE version 5.3.

The Simplified Presentation of Incredibly Complex Evaluations (SPICE) program support analysis of T cell functional profiles. It is a data mining application that analyses large FLOWJO data sets from polychromatic flow cytometry and allows to test for differences between groups of samples

based on the multi-component measurements (43). Pestle converts FLOWJO table to adequate form to use into SPICE.

### **MHC class I pentamer staining**

Thawed PBMC ( $1-2 \times 10^6$ ) were incubated with pentamers (previously centrifuged at 14000g 10 min), fixable NIR LIVE/DEAD and antibodies specific for cells surface markers (listed in table S6). For intracellular/intranuclear staining PBMC were first stained with pentamers and surface antibodies, then fixed and permeabilized using Foxp3/Transcription Factor Staining Buffer Set (eBioscience 00-5523-00) for 45 minutes at room temperature, protected from the light, and stained with intracellular/intranuclear antibodies (listed in table S8).

### **Detection of HCV and ChAd3 Antibodies**

HCV Abs were measured at the EOS using the automated clinical Abbott architect immunoassay. ChAd3 neutralising antibody (nAb) titres were assayed as previously described using a secreted alkaline phosphatase (SEAP) assay (8).

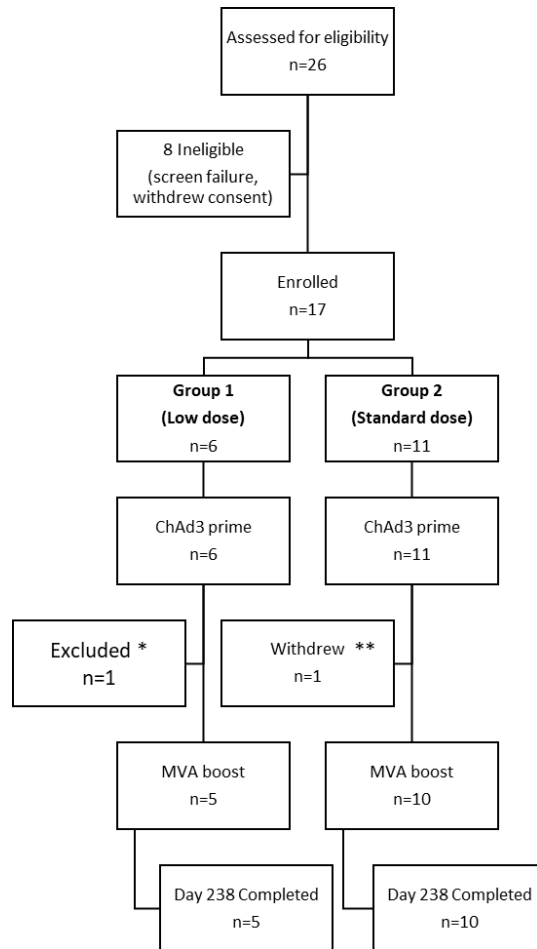

**Fig. S1. Flow chart of study participants.**

Consort flow diagram showing enrollment and follow-up in the PEACHI 03 trial.

\*One volunteer in Group 1 was excluded (after receiving a non-study vaccine) and was replaced with a new volunteer.

\*\*One volunteer in Group 2 withdrew consent (moved from the study area) after receiving the ChAd3-NSmut vaccination and was replaced with a new volunteer.

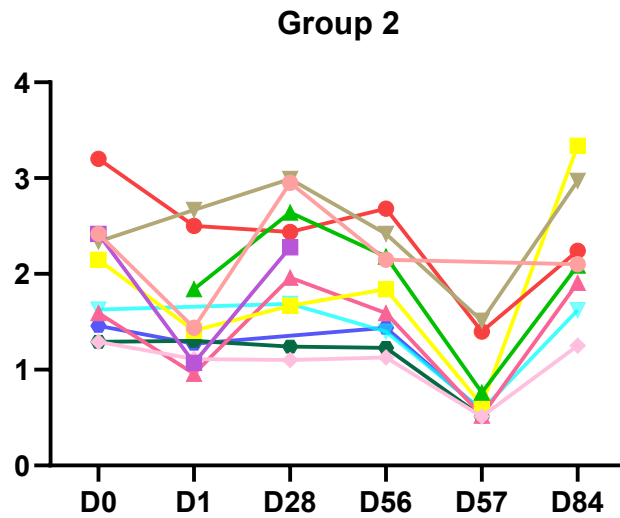

**Fig. S2. Lymphocyte count after ChAd3/MVA-hLiNSmut vaccination.**

Peripheral blood lymphocyte counts for group 2 (standard dose-ChAd3-hLiNSmut  $2.5 \times 10^{10}$  vp/MVA-hLiNSmut  $2 \times 10^8$  pfu,  $n = 11$ ) were measured at different time points at d0, 1, 28, 56, 57 and 84 after hLiNSmut vaccine regimen.

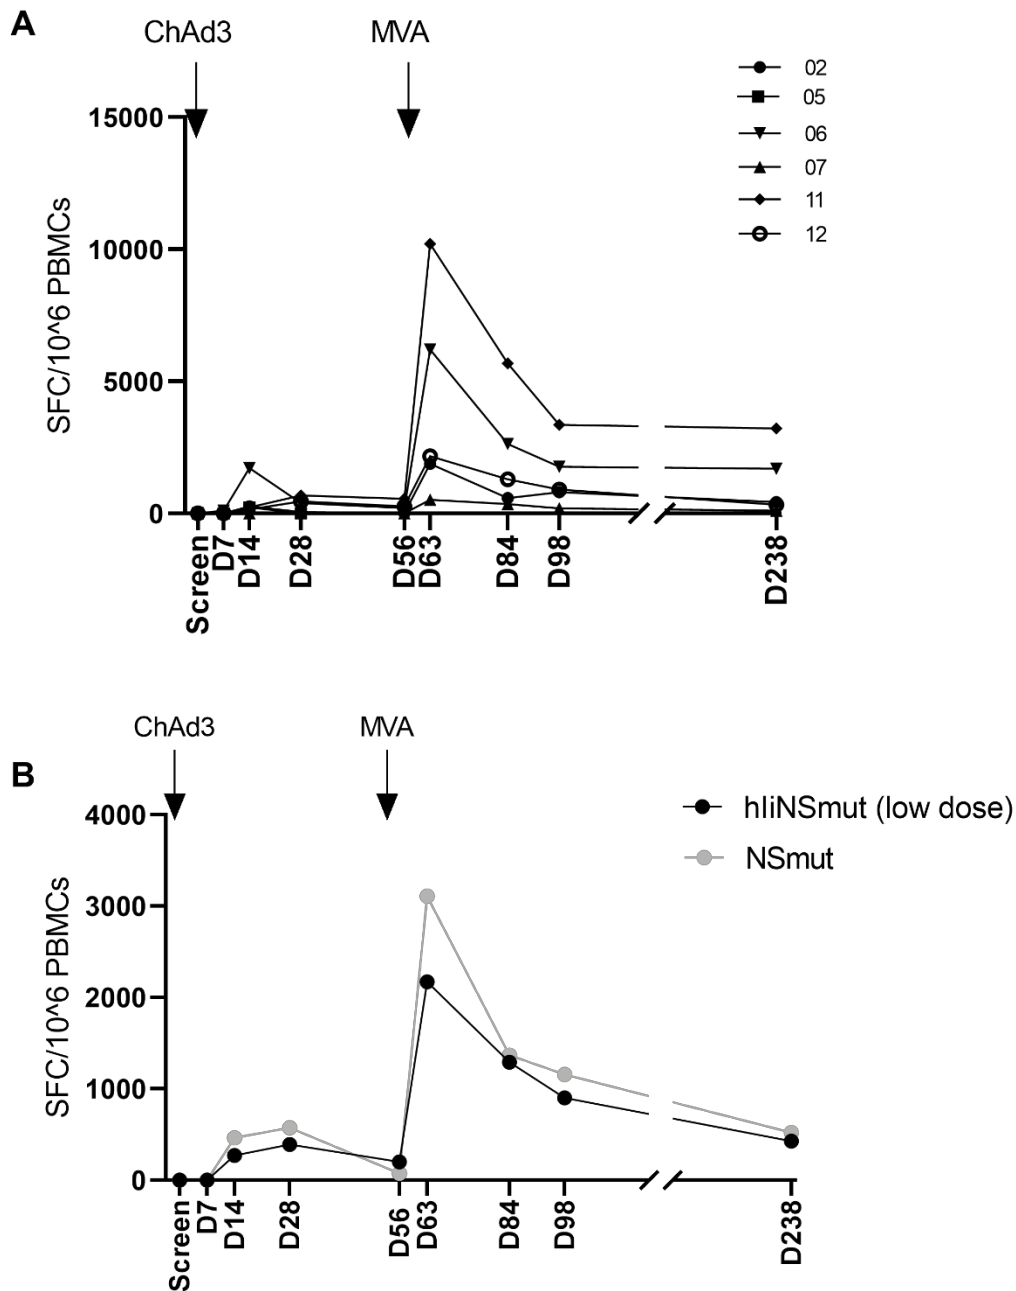

**Fig. S3. Magnitude of ChAd3/MVA-hliNSmut low dose (group 1).** The total ex vivo IFN- $\gamma$  ELISpot response to the NS region of HCV is shown over time (calculated by summing the responses of positive pools corrected for background; see Materials and Methods). (A) The kinetics of the response is shown for 6 volunteers who received the prime dose ChAd3-hliNSmut and 5 that were boosted with MVA-hliNSmut at low dose (ChAd3-hliNSmut  $5 \times 10^9$  vp/MVA-hliNSmut  $5 \times 10^7$  pfu). (B) Comparisons in ELISpot responses in volunteers receiving ChAd3/MVA-hliNSmut at low dose (group 1) (black;  $n = 5$ ) or ChAd3/MVA-NSmut (gray;  $n = 17$ ) at standard dose. The median ex vivo IFN- $\gamma$  ELISpot response to HCV NS is shown. Arrows above graph indicate vaccination timepoints.

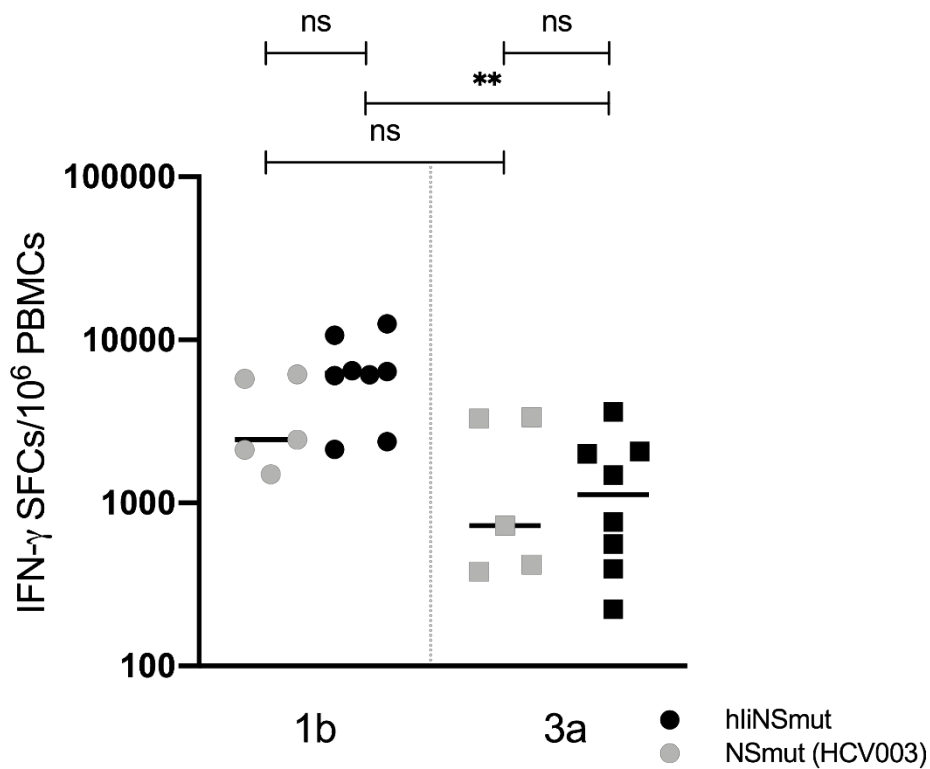

**Fig. S4. Cross-reactivity of response in volunteers vaccinated with ChAd3/MVA-NSmut or ChAd3/MVA-hliNSmut.**

Cross-reactivity of T cell response evaluated by IFN- $\gamma$  ELISpot: total magnitude of T cell responses using peptide pools covering the NS region of HCV genotype 1b (vaccine strain) compared to genotype 3a for volunteers vaccinated with ChAd3/MVA-hliNSmut (black;  $n = 8$ ) or ChAd3/MVA-NSmut (gray;  $n = 5$ ) (Two-tailed Mann-Whitney test) at peak after boost. Bars shown are median.  $**P \leq 0.01$ .

**A**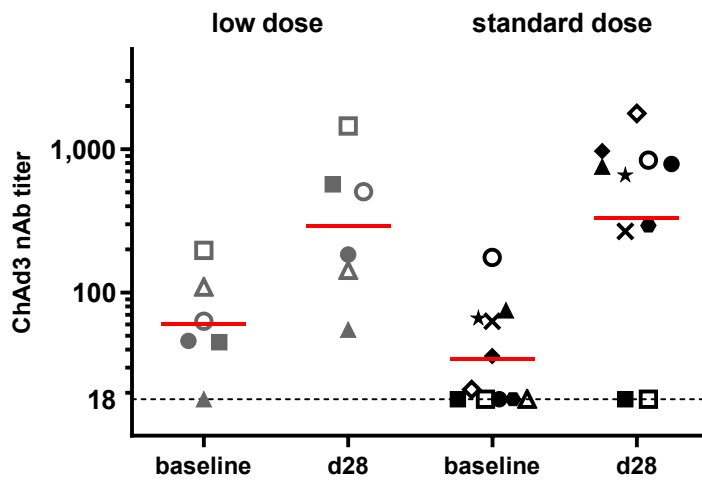**B**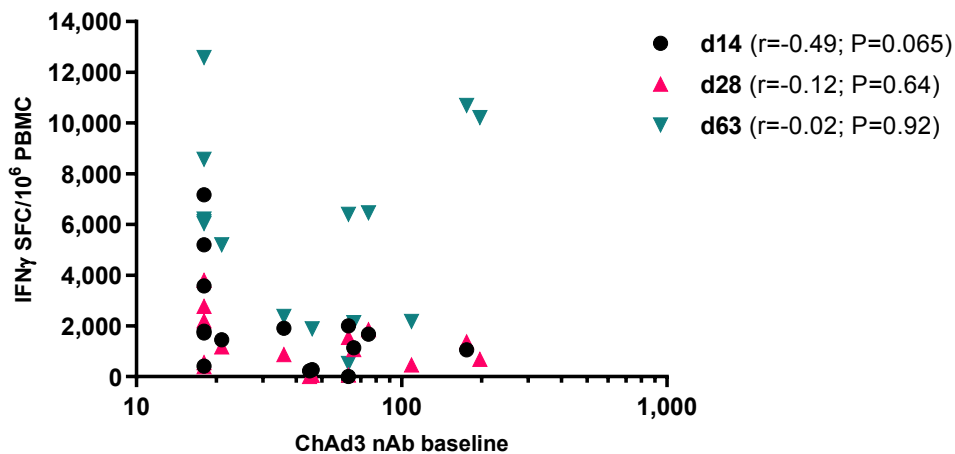

**Fig. S5. ChAd3 neutralizing antibody at baseline and at peak after prime after low dose and standard dose of ChAd3/MVA-hliNSmut.**

(A) Titers of cross-neutralizing antibodies against ChAd3 in sera of volunteers at baseline and at d28 at low dose (group 1- ChAd3-hliNSmut  $5 \times 10^9$  vp/MVA-hliNSmut  $5 \times 10^7$  pfu,  $n = 6$ ) and standard dose (group 2- ChAd3-hliNSmut  $2.5 \times 10^{10}$  vp/MVA-hliNSmut  $2 \times 10^8$  pfu,  $n = 11$ ) of hli vaccine regimen by a secreted alkaline phosphatase (SEAP) assay. (B) Correlation between IFN- $\gamma$  ELISpot response at d14, d28 and d63 and titers of cross-neutralizing antibodies against ChAd3 at baseline.

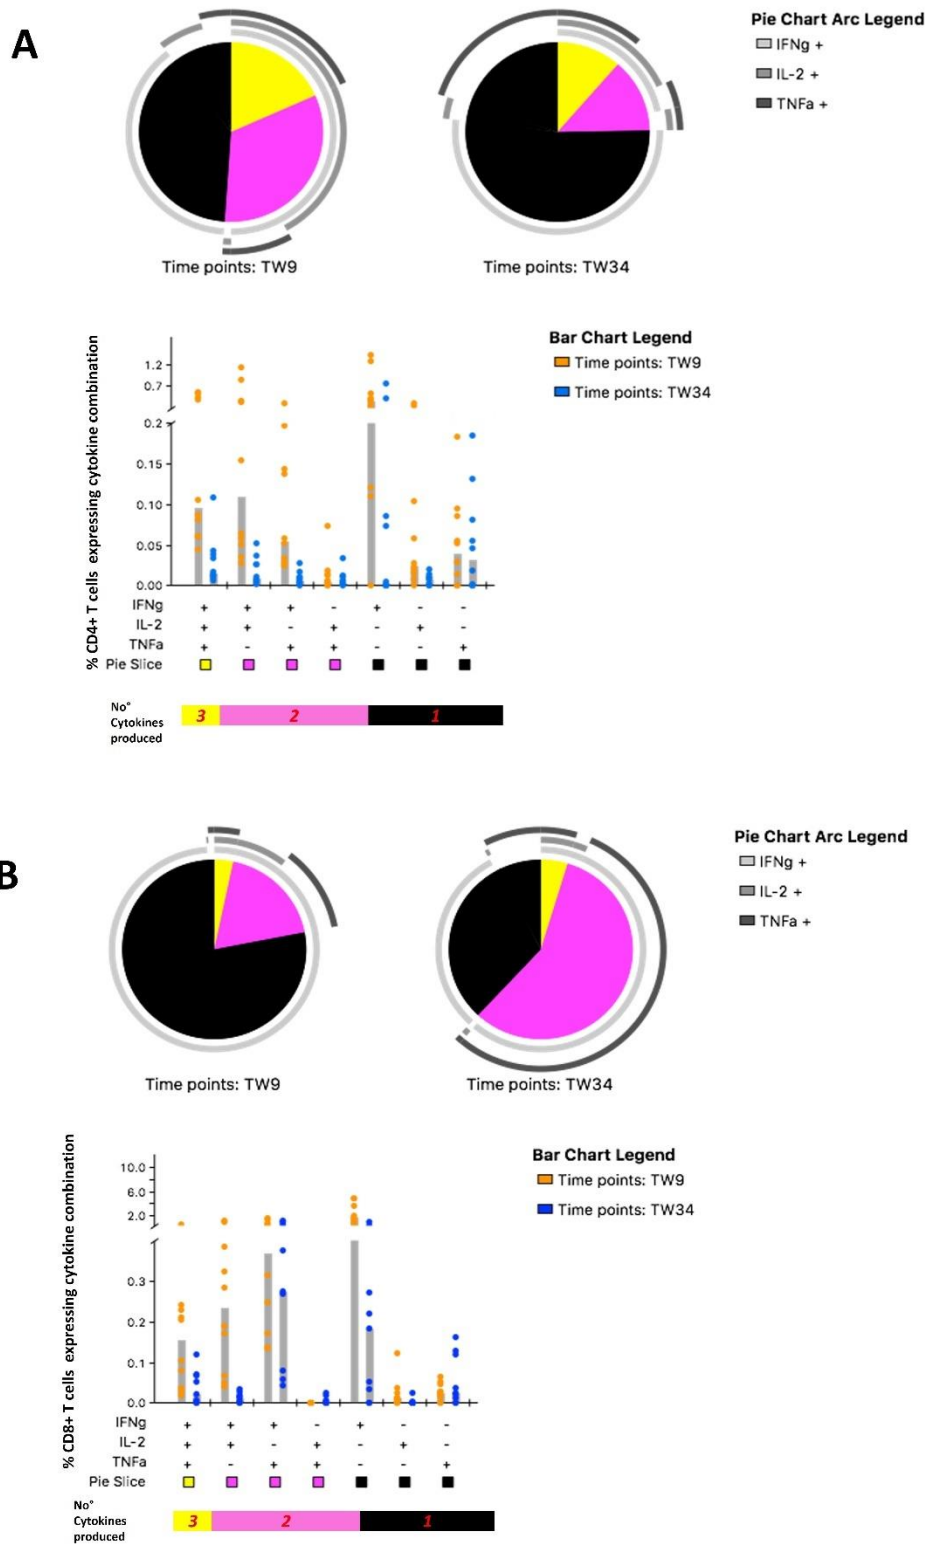

**Fig. S6. Polyfunctionality of HCV-specific CD4<sup>+</sup> and CD8<sup>+</sup> T cells in volunteers receiving ChAd3/MVA-hIiNSmut vaccination.**

Dot plots show frequencies of antigen-specific CD4<sup>+</sup> (A) and CD8<sup>+</sup> (B) T cell populations defined by parameters shown on the x axis at peak after boost (orange dots) and EOS (blue dots) after stimulation with pools F+G (NS3), H+I (NS4-NS5A) and L+M (NS5B) for 6 hours and analyzed by ICS. Black



bars indicate interquartile ranges. Pie charts show proportions of cytokine-secreting T cells that produce one (black), two (pink) or three (yellow) cytokines measured. Pie arcs show the proportion of cytokine-producing cells that makes a given cytokine. The polyfunctionality analysis was performed using Pestel and SPICE program. Pie base, median.

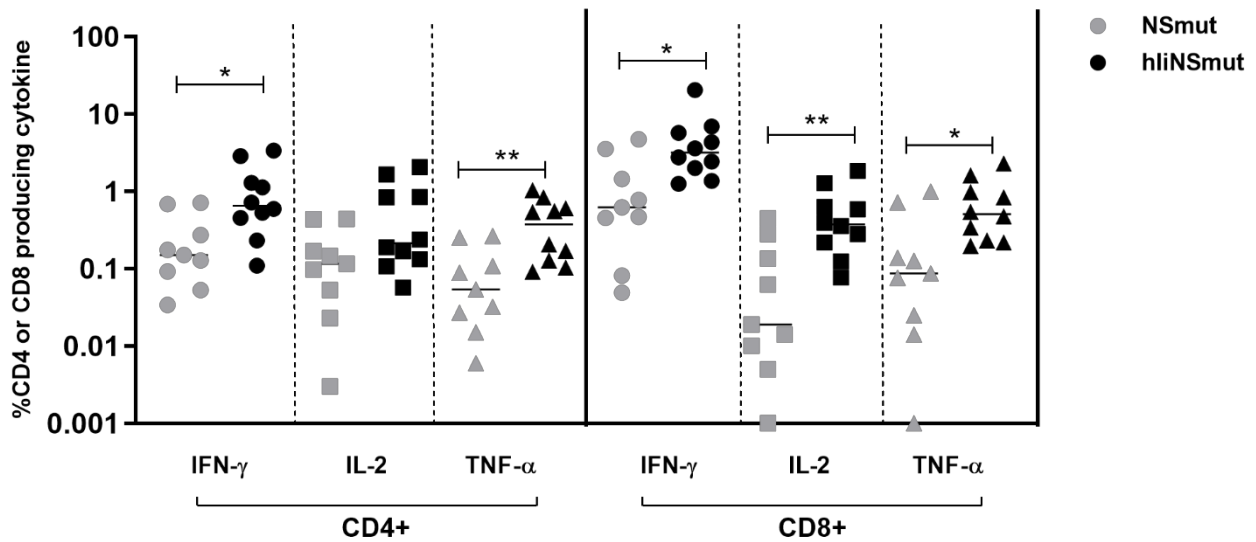

**Fig. S7. Comparison of functionality of vaccine-induced T cell responses between ChAd3/MVA-NSmut with and without Ii.**

Percentage of total CD4<sup>+</sup> and CD8<sup>+</sup> T cells producing IFN- $\gamma$ , IL-2 or TNF- $\alpha$  after stimulation with NS3-5 peptide pools at peak after boost using fresh cells in ICS for healthy volunteers vaccinated with ChAd3/MVA-NSmut (gray symbols,  $n = 9$ ) and ChAd3/MVA-hIiNSmut (black symbols,  $n = 10$ ) (Two-tailed Mann-Whitney test CD4<sup>+</sup> IFN- $\gamma$  and TNF- $\alpha$ ) (Two-tailed Mann-Whitney test CD8<sup>+</sup> IFN- $\gamma$ , IL-2 and TNF- $\alpha$ ). The summed value is shown after DMSO subtraction. Bars represent median. \* $P \leq 0.05$ ; \*\* $P \leq 0.01$ .

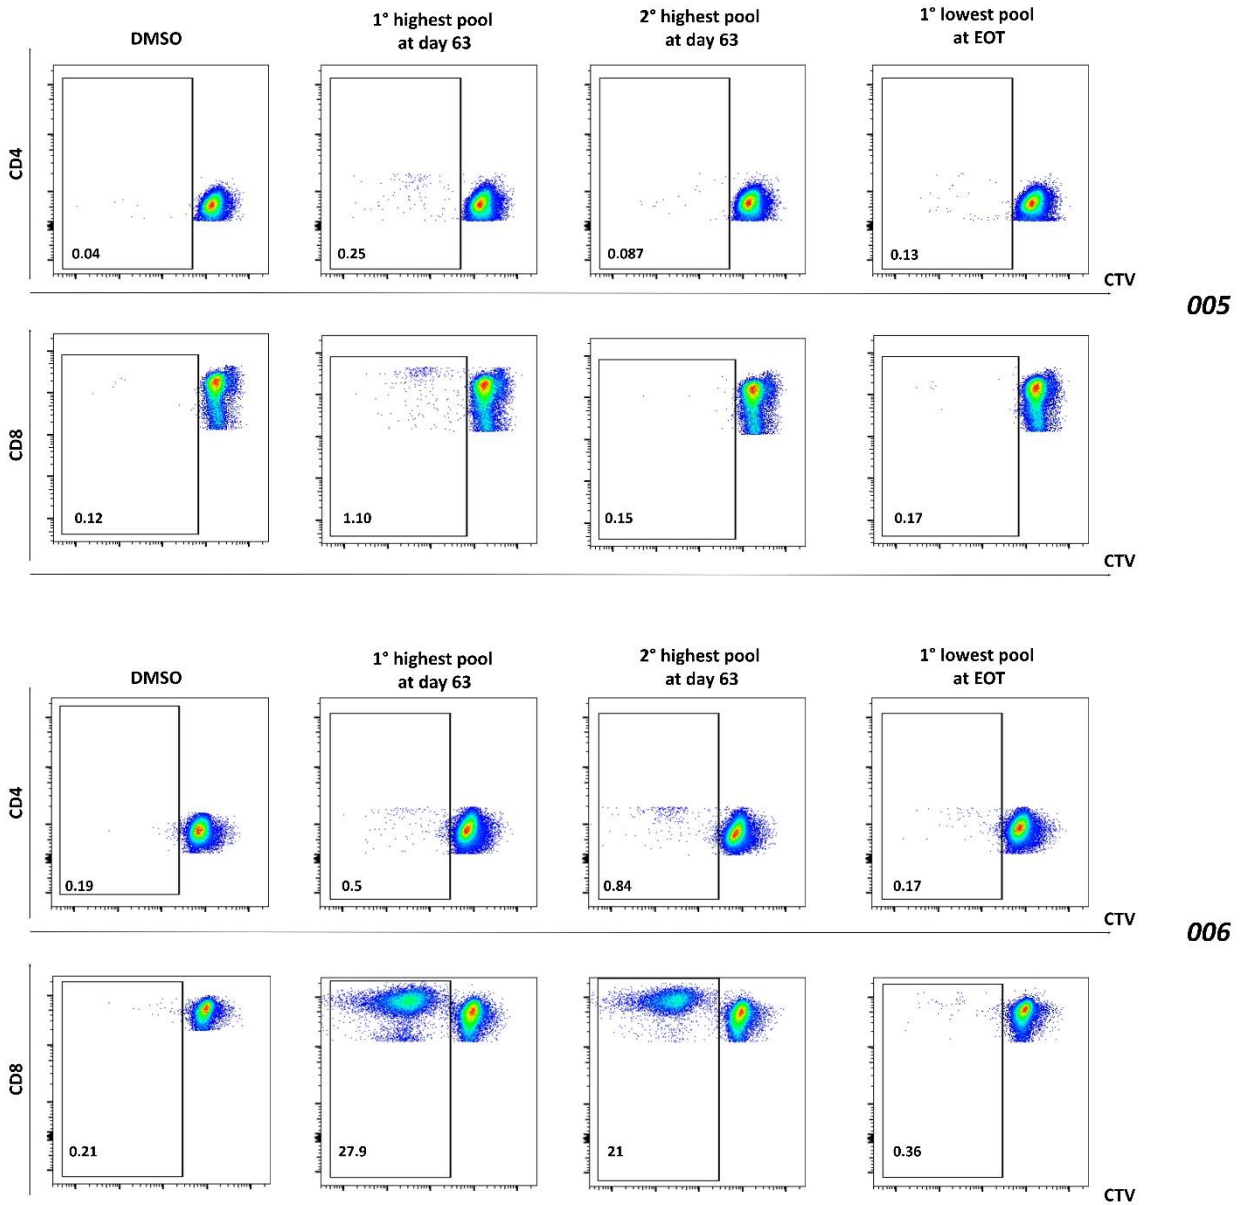

**Fig. S8. Gating strategy of proliferated T cells after peptide stimulation.**

Example FACS plots for subject at EOS after ChAd3/MVA-NSmut (005) or ChAd3/MVA-hliNSmut (006) vaccine regimen after stimulation with DMSO (negative control), peptide pools 1 (first highest pool at boost), peptide pools 2 (second highest pool at boost) and peptide pools 3 (lowest pool at EOS that is positive at boost) for CD4<sup>+</sup> and CD8<sup>+</sup> T cell population using a cell tracer violet (CTV) assay. Cells were gated on singlet lymphocytes, live, CD3<sup>+</sup> T cells; CD4<sup>+</sup>, CD8<sup>+</sup> and CTV cell populations are shown.

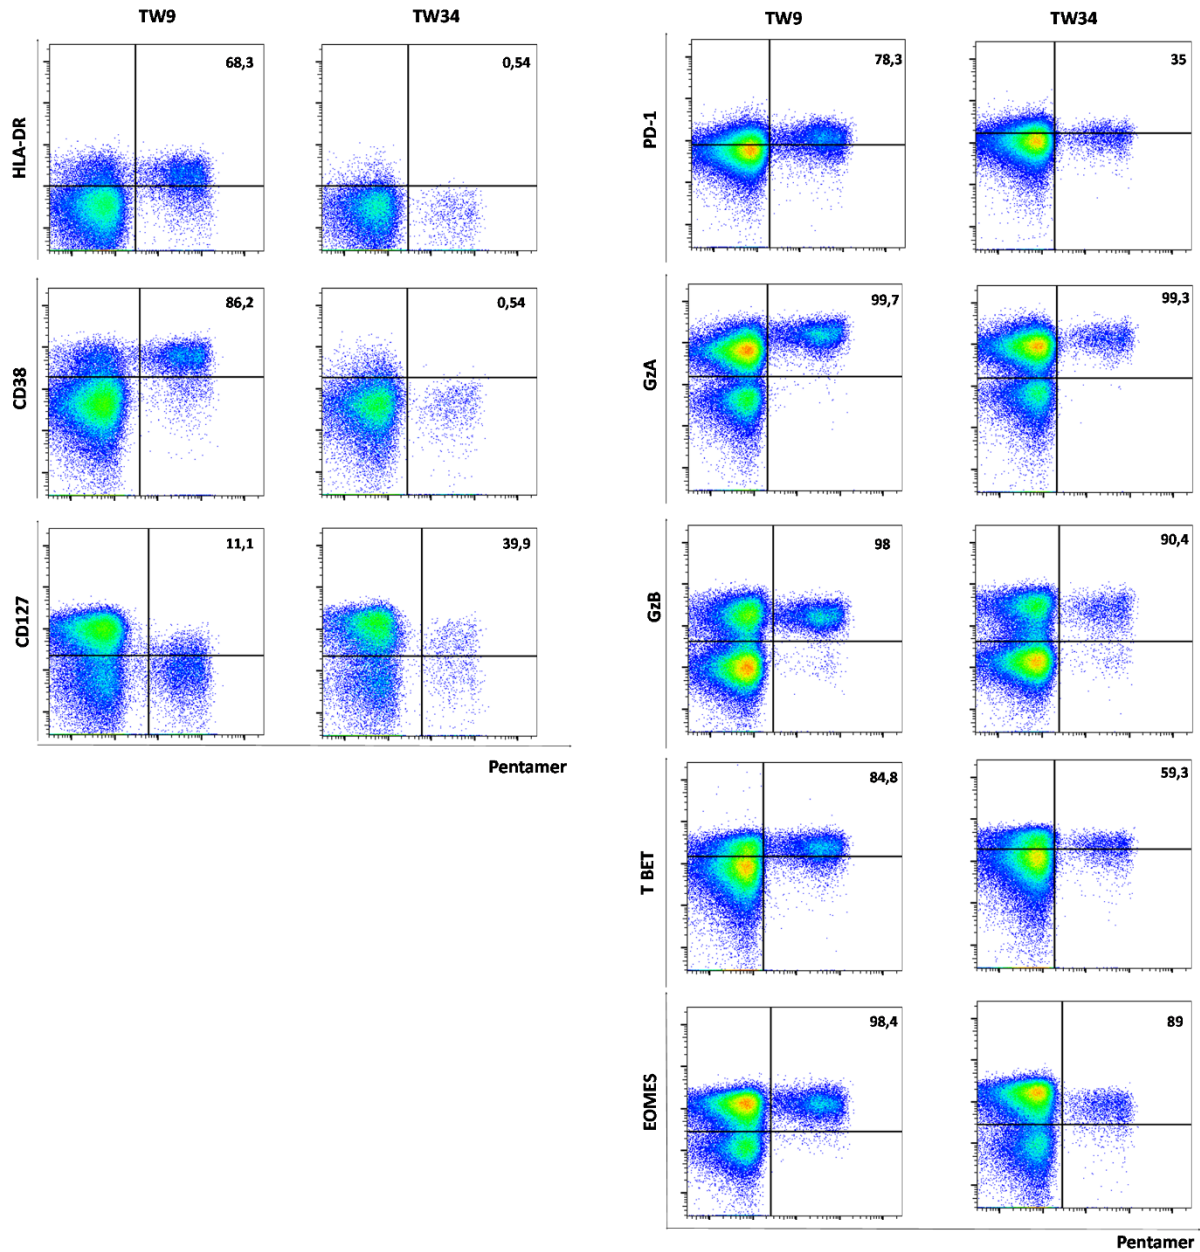

**Fig. S9. Gating strategy for MHC class I pentamer<sup>+</sup> CD8<sup>+</sup> T cells expressing markers.**

Example FACS plots from volunteer 002 vaccinated with ChAd3/MVA-hliNSmut at peak after boost and at EOS are shown for phenotypic markers (Y axis) analyzed against pentamer staining (x axis; HCV NS3 1406-1415, HLA-A\*0201). The percentage of the pentamer<sup>+</sup> CD8<sup>+</sup> T cells that express a given marker is shown (gated using the fluorescence minus one [FMO]).

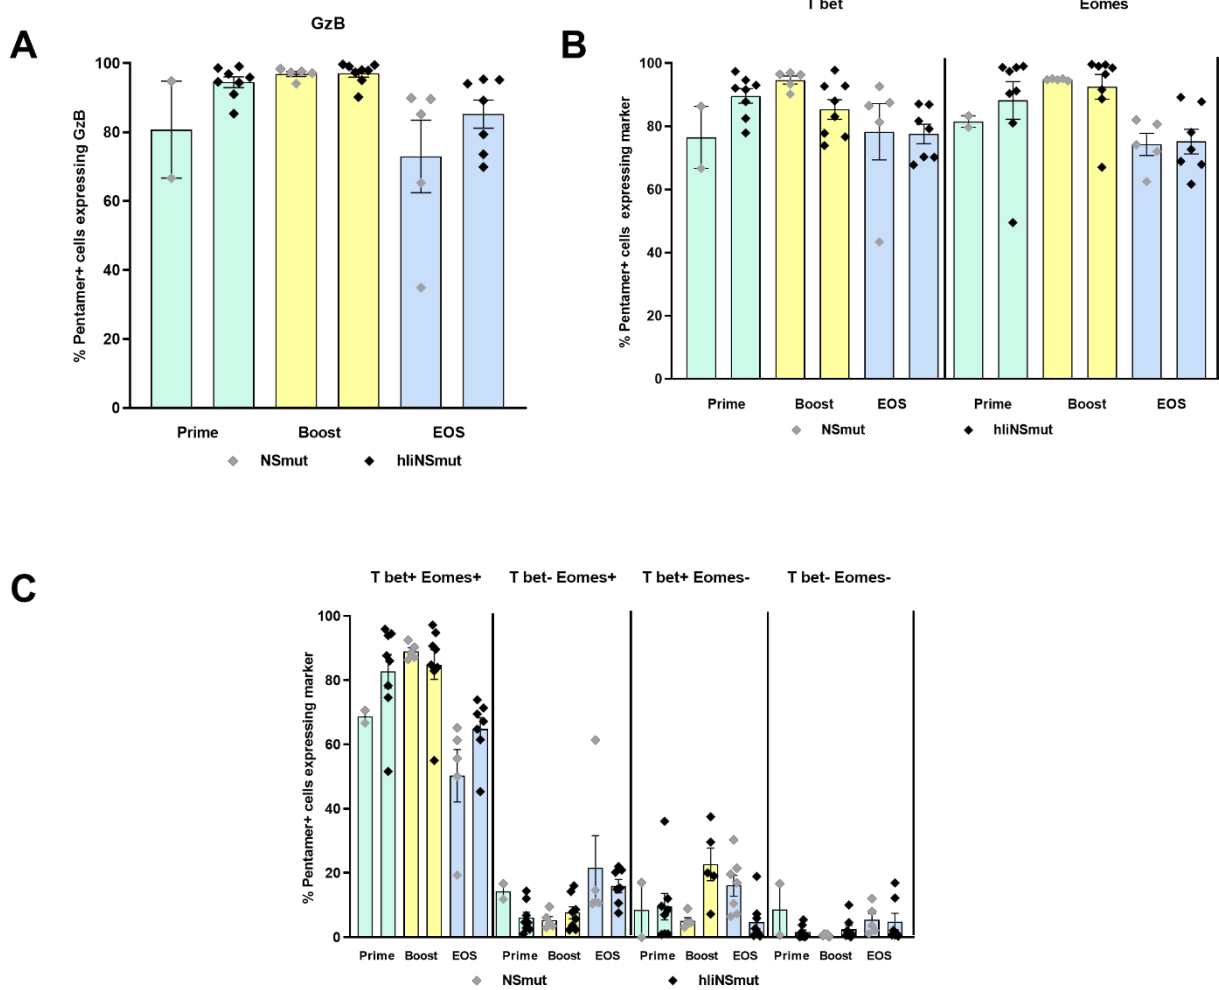

**Fig. S10. MHC class I phenotypic analysis of pentamer<sup>+</sup> CD8<sup>+</sup> T cells after ChAd3/MVA-NSmut vaccine regimen with or without Ii in healthy volunteers.**

(A-B) The percentage of the pentamer<sup>+</sup> cells expressing phenotypic markers GzB, Tbet or Eomes from volunteers vaccinated with ChAd3/MVA-NSmut or ChAd3/MVA-hIiNSmut at peak after prime (green bars, gray  $n = 2$ ; black,  $n = 8$ ), at peak after boost (yellow bars, gray  $n = 5$ ; black  $n = 8$ ) and at EOS (light blue bars, gray  $n = 5$ ; black  $n = 8$ ). Mean with SEM is shown. (C) Co-staining with pentamers and human antibodies against Tbet and Eomes over the course of the study. All pentamer staining and phenotyping performed ex vivo without culture. Mean with SEM is shown.

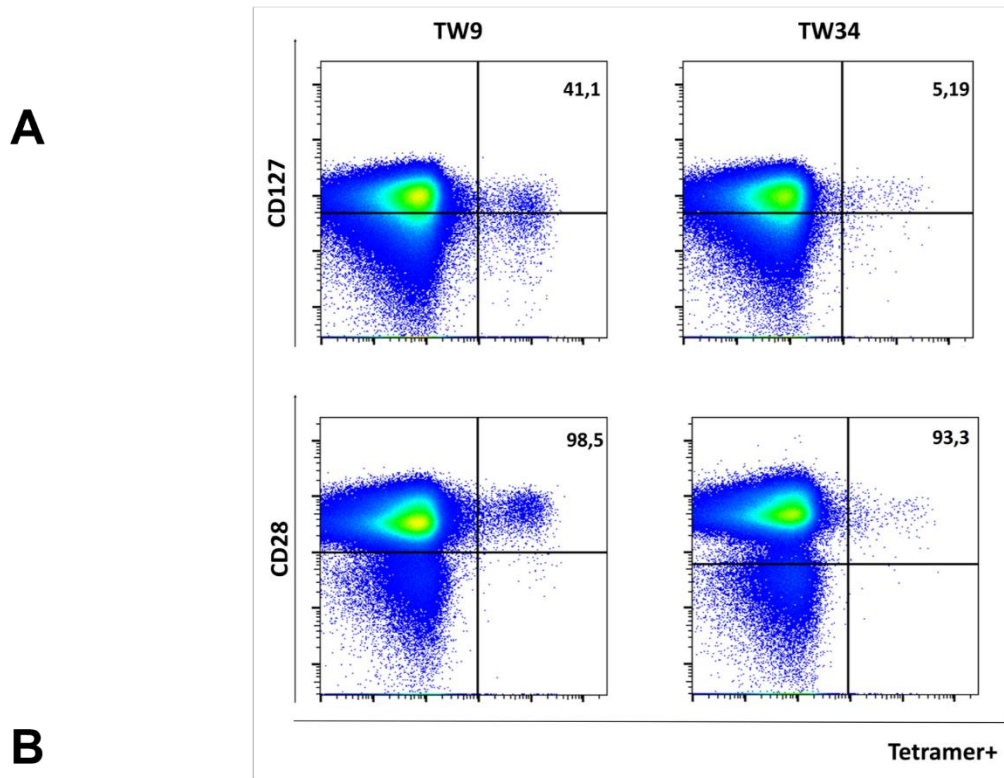

**Fig. S11. MHC class II phenotypic analysis after ChAd3/MVA-NSmut vaccine regimen with or without Ii in healthy volunteers.**

(A) Example FACS plots from volunteer 004 vaccinated with ChAd3-hliNSmut/MVA-hliNSmut at peak after boost and at EOS are shown for phenotypic markers (Y axis) analyzed against tetramer staining (x axis; HCV NS4b 1806-1818 TLLFNILGGWVAA, HLA-DRB1\*0101). The percentage of

the tetramer<sup>+</sup> CD4<sup>+</sup> T cells that express a given marker is shown (gated using the fluorescence minus one [FMO]). **(B)** The percentage of tetramer<sup>+</sup> cells expressing phenotypic marker CD28 from volunteers vaccinated with ChAd3/MVA-NSmut or ChAd3/MVA-hliNSmut at peak after prime (green bars, gray  $n = 3$ ; black  $n = 4$ ), at peak after boost (yellow bars, gray  $n = 4$ ; black  $n = 5$ ) and EOS (light blue bars, gray  $n = 4$ ; black  $n = 5$ ). All tetramer staining and phenotyping performed ex vivo without culture.

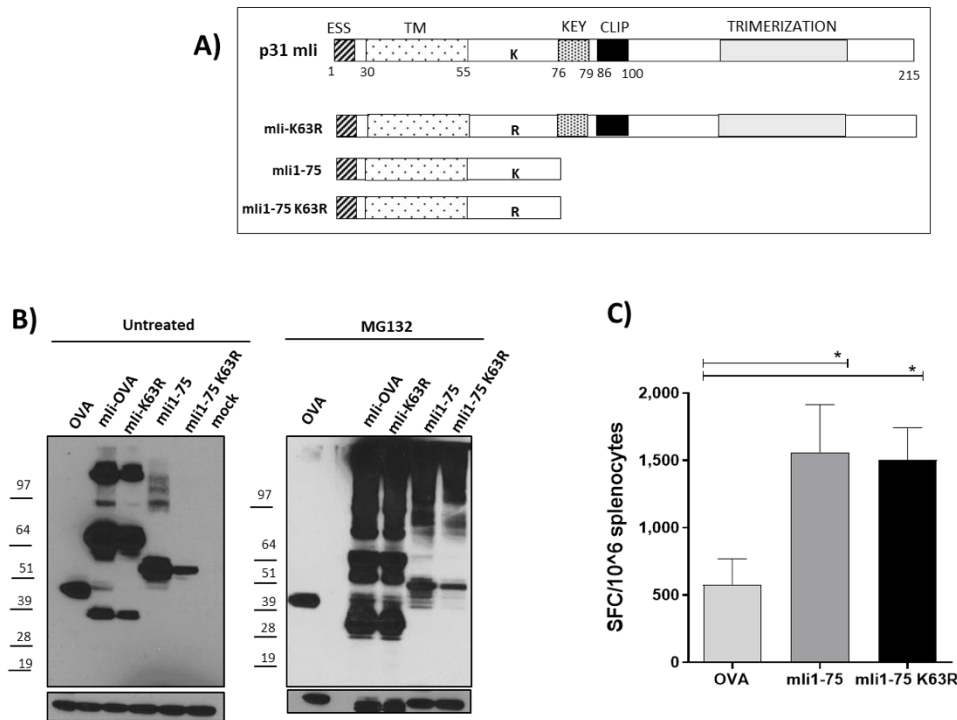

**Fig. S12. Ii acts as a degron signal for antigen ubiquitination, degradation, and enhanced immunogenicity.**

(A) Schematic representation of Ad5 vectors encoding for mli-OVA fusions. Lysine (K) to arginine (R) mutation was introduced at position 63 by site-directed mutagenesis on mli full-length mouse invariant chain and mli1-75 s variant. (B) HeLa cells were infected at MOI 100 with Ad5 encoding OVA alone, mli full-length or mli1-75 OVA fusions as indicated. K63R constructs were compared with K63 control sequence. After infection, cells were left untreated or incubated with MG132. OVA protein expression was analyzed by Western blotting by anti-HA antibody. GAPDH expression was used as an internal control. The experiments were performed three times. (C) C57BL/6 mice were vaccinated with Ad5 viral vectors encoding OVA, mli1-75 OVA or mli1-75 OVA K63R, as indicated. Two weeks after a single intramuscular immunization, spleens were harvested to measure IFN- $\gamma$ -producing T cells by ELISpot assay. Results are expressed as number of IFN- $\gamma$ -producing T cells per millions of splenocytes (Kruskal-Wallis test mli1-75 OVA K63R versus OVA; mli1-75 OVA versus OVA). The experiments were performed twice. \* $P \leq 0.05$ .

**Table S1. Study design of ChAd3/MVA-NSmut vaccines with or without hli.**

Study design and dose of hli and non-hli vaccination regimens at prime time week (TW) 0 and at boost time week (TW) 8.

**hli vaccines**

| Study Name                        | Number of subjects | Priming vaccine (TW0) | Dose priming vaccine     | Boosting vaccine (TW8) | Dose boosting vaccine  | Follow up (weeks) |
|-----------------------------------|--------------------|-----------------------|--------------------------|------------------------|------------------------|-------------------|
| PEACHI 03 group 1 (low dose)      | 5                  | ChAd3-hliNSmut        | 5 x10 <sup>9</sup> vp    | MVA-hliNSmut           | 5 x10 <sup>7</sup> pfu | 34                |
| PEACHI 03 group 2 (standard dose) | 10                 | ChAd3-hliNSmut        | 2.5 x10 <sup>10</sup> vp | MVA-NSmut              | 2 x10 <sup>8</sup> pfu | 34                |

**Non hli vaccines**

| Study Name        | Number of subjects | Priming vaccine (TW0) | Dose priming vaccine     | Boosting vaccine (TW8) | Dose boosting vaccine  | Follow up (weeks) |
|-------------------|--------------------|-----------------------|--------------------------|------------------------|------------------------|-------------------|
| PEACHI 04 group 1 | 8                  | ChAd3-NSmut           | 2.5 x10 <sup>10</sup> vp | MVA-NSmut              | 2 x10 <sup>8</sup> pfu | 34                |
| HCV003 Arm A2     | 11                 | ChAd3-NSmut           | 2.5 x10 <sup>10</sup> vp | MVA-NSmut              | 2 x10 <sup>8</sup> pfu | 34                |



**Table S2. Inclusion and exclusion criteria for the recruitment of healthy volunteers in ChAd3/MVA-hliNSmut vaccine regimen.**

|                                  |                                                                                                                                                                                                                                                                                                                                                                                                                                                                                                                                                                                                                                                                                                                                                                                                                                                                                                                                                                                                                                                                                                                                                                                                                                                                                                                                                                                                                                                                                                                                                                                                                                                                                                                                                                                                                                                                                                                                                                                                                |
|----------------------------------|----------------------------------------------------------------------------------------------------------------------------------------------------------------------------------------------------------------------------------------------------------------------------------------------------------------------------------------------------------------------------------------------------------------------------------------------------------------------------------------------------------------------------------------------------------------------------------------------------------------------------------------------------------------------------------------------------------------------------------------------------------------------------------------------------------------------------------------------------------------------------------------------------------------------------------------------------------------------------------------------------------------------------------------------------------------------------------------------------------------------------------------------------------------------------------------------------------------------------------------------------------------------------------------------------------------------------------------------------------------------------------------------------------------------------------------------------------------------------------------------------------------------------------------------------------------------------------------------------------------------------------------------------------------------------------------------------------------------------------------------------------------------------------------------------------------------------------------------------------------------------------------------------------------------------------------------------------------------------------------------------------------|
| <p><b>Inclusion Criteria</b></p> | <ul style="list-style-type: none"> <li>• Aged at least 18 years on the day of screening and no greater than 65 years on the day of the first vaccination</li> <li>• Resident in or easy access to the trial site for the duration of the study</li> <li>• Available for follow-up for the planned duration of the study</li> <li>• Able and willing (in the CI's opinion) to comply with all study requirements</li> <li>• Willing to allow the investigators to discuss the volunteer's medical history with their General Practitioner</li> <li>• For heterosexual females, willingness to practice continuous effective contraception from screening until 4 months after the last immunisation</li> <li>• All female volunteers must be willing to undergo urine pregnancy tests at the time points specified in the Schedule of Procedures and must have a negative pregnancy test on the day(s) of vaccination</li> <li>• For sexually active men, willingness to use condoms from screening until 4 months after the last vaccination</li> <li>• Agreement to refrain from blood donation during the course of the study</li> <li>• In the opinion of the Chief Investigator or designee, the volunteer has understood the information provided. Written informed consent must be given before any study-related procedures are performed</li> <li>• Willing to undergo HCV and HIV testing, counselling and receive test results</li> <li>• Specific for Groups 1 and 2:</li> <li>• Healthy males or females, as assessed by medical history, physical examination and laboratory tests</li> <li>• Specific for Group 3:</li> <li>• A previous diagnosis of chronic HCV infection (any HCV genotype) successfully treated with all oral DAA therapy.</li> <li>• Minimum duration of six months between last dose of DAA treatment and planned vaccination date</li> <li>• SVR 12 following last DAA treatment course</li> <li>• Fibroscan score of &lt;12.5kPa within 6 months of screening</li> </ul> |
| <p><b>Exclusion Criteria</b></p> | <ul style="list-style-type: none"> <li>• Participation in another research study involving an investigational product in the 30 days preceding enrolment, or planned used during the study period</li> <li>• Prior receipt of a recombinant simian adenoviral vaccine</li> <li>• Receipt of any investigational HCV vaccine within the last 6 years</li> <li>• Administration of immunoglobulins and/or any blood products within the last three months preceding the planned administration of the vaccine candidate</li> <li>• Receipt of live attenuated vaccine within the previous 60 days or planned receipt within 60 days after vaccination with the IMP</li> <li>• Receipt of other vaccine, including influenza vaccine, within the previous 14 days or planned receipt within 14 days after vaccination with the IMP</li> <li>• Any confirmed or suspected immunosuppressive or immunodeficient state, including HIV infection; asplenia; recurrent, severe infections and chronic (more than 14 days) immunosuppressive medication within the last 6 months (inhaled and topical steroids are allowed)</li> </ul>                                                                                                                                                                                                                                                                                                                                                                                                                                                                                                                                                                                                                                                                                                                                                                                                                                                                                  |

- History of allergic disease or reactions likely to be exacerbated by any component of the vaccine
- Any history of anaphylaxis in reaction to vaccination
- Pregnancy, lactation or willingness/intention to become pregnant during the study
- Personal history of autoimmune disease
- History of major autoimmune disease in first degree relative, e.g. Type 1 diabetes, Graves' Disease, Systemic Lupus Erythematosus (SLE) or Spondyloarthropathy (AS).
- HLA type B27 positive individuals
- History of cancer (except basal cell carcinoma of the skin and cervical carcinoma in situ)
- History of serious psychiatric condition
- Any other serious chronic illness requiring hospital specialist supervision
- Suspected or known current alcohol abuse as defined by an alcohol intake of greater than 42 units every week
- Suspected or known current injecting drug use
- Seropositive for hepatitis B surface antigen (HBsAg)
- Any clinically significant acute or chronic medical condition that is considered unstable/progressive, or in the opinion of the Chief Investigator, may either put the volunteer at risk because of participation in the study, or may influence the result of the study, or the volunteer's ability to participate in the study
- Any clinically significant abnormal finding on screening biochemistry or haematology blood test or urinalysis
- Any other finding which in the opinion of the investigators would significantly increase the risk of having an adverse outcome from participating in the protocol
- Vulnerable subjects (according to ICH GCP)

*Specific for groups 1 and 2:*

- Previous HCV infection
- Reported current or previous high-risk behaviour for HCV infection (including IVDU)
- Seropositive for hepatitis C virus (antibodies to HCV) at screening

*Specific for group 3:*

- Cirrhosis or severe fibrosis (Ishak 5 or 6) as previously defined by any of the following:
  - Radiological findings on CT, MR or USS
  - Abnormal biochemical parameters (PT, albumin and bilirubin)
  - clinical signs of liver decompensation (ascites, varices, encephalopathy)
- Ishak score  $\geq 5$  on liver biopsy
- Fibroscan at any time point in the past  $>12.5\text{kPa}$

**Table S3. Unsolicited AEs (clinical).**

| <b>Volunteer</b> | <b>Group</b> | <b>Time point</b> | <b>Grade</b> | <b>Parameter</b>                                                                   | <b>Relationship</b> |
|------------------|--------------|-------------------|--------------|------------------------------------------------------------------------------------|---------------------|
| 01106            | 1            | Day 69            | 1            | Cough, fever, muscle ache                                                          | Possible            |
| 01107            | 1            | Day 23            | 2            | Flu-like syndrome                                                                  | Possible            |
| 01107            | 1            | Day 141           | 2            | Hay fever symptoms worse than previous year                                        | Unlikely            |
| 01111            | 1            | Day 84            | 1            | Runny nose, sore throat                                                            | Unlikely            |
| 01112            | 1            | Day 234           | 2            | Urinary tract infection                                                            | Unlikely            |
| 01117            | 2            | Day 0             | 1            | Tingling sensation on left arm after vaccination lasting 20 seconds, self-resolved | Definite            |
| 01117            | 2            | Day 21            | 1            | Feverishness, tiredness, dry cough                                                 | Possible            |
| 01119            | 2            | Day 45            | 1            | Acne                                                                               | Unlikely            |
| 01122            | 2            | Day 7             | 2            | Gastrointestinal discomfort                                                        | Possible            |
| 01122            | 2            | Day 14            | 1            | Back pain                                                                          | Unlikely            |
| 01122            | 2            | Day 26            | 1            | Gastrointestinal discomfort                                                        | Possible            |
| 01122            | 2            | Day 70            | 1            | Back pain                                                                          | Unlikely            |

Unsolicited clinical events occurring within 30 days of receipt of ChAd-hliNSmut or MVA-hliNSmut vaccines. All were considered possibly related to vaccination.

**Table S4. Frequency of unsolicited laboratory AEs.**

| <b>Volunteer</b> | <b>Group</b> | <b>Time point</b> | <b>Grade</b> | <b>Parameter</b> | <b>Relationship</b> |
|------------------|--------------|-------------------|--------------|------------------|---------------------|
| 01106            | 1            | Day 57            | 1            | Low lymphocytes  | Definite            |
| 01107            | 1            | Day 28            | 1            | Low leukocytes   | Definite            |
| 01107            | 1            | Day 28            | 1            | Low neutrophils  | Definite            |
| 01111            | 1            | Day 57            | 3            | Low lymphocytes  | Definite            |
| 01112            | 1            | Day 28            | 1            | Raised bilirubin | Possible            |
| 01112            | 1            | Day 28            | 1            | Low leukocytes   | Definite            |
| 01112            | 1            | Day 28            | 1            | Low neutrophils  | Definite            |
| 01113            | 2            | Day 28            | 1            | Hypokalaemia     | Possible            |
| 01113            | 2            | Day 28            | 1            | Low neutrophils  | Definite            |
| 01113            | 2            | Day 84            | 2            | Hypokalaemia     | Possible            |
| 01113            | 2            | Day 84            | 1            | Low neutrophils  | Definite            |
| 01115            | 2            | Day 57            | 1            | Low lymphocytes  | Definite            |
| 01116            | 2            | Day 28            | 1            | Raised bilirubin | Possible            |
| 01116            | 2            | Day 57            | 2            | Low lymphocytes  | Definite            |
| 01117            | 2            | Day 84            | 1            | Hypokalaemia     | Possible            |
| 01119            | 2            | Day 57            | 2            | Low lymphocytes  | Definite            |
| 01120            | 2            | Day 1             | 1            | Low lymphocytes  | Definite            |
| 01120            | 2            | Day 57            | 2            | Low lymphocytes  | Definite            |
| 01120            | 2            | Day 84            | 1            | Low haemoglobin  | Definite            |
| 01122            | 2            | Day 57            | 2            | Low lymphocytes  | Definite            |
| 01125            | 2            | Day 1             | 1            | Low haemoglobin  | Possible            |
| 01125            | 2            | Day 28            | 1            | Low haemoglobin  | Possible            |
| 01125            | 2            | Day 56            | 1            | Low haemoglobin  | Possible            |
| 01125            | 2            | Day 57            | 2            | Low haemoglobin  | Possible            |
| 01125            | 2            | Day 84            | 2            | Low haemoglobin  | Possible            |
| 01125            | 2            | Day 98            | 2            | Low haemoglobin  | Possible            |
| 01125            | 2            | Day 57            | 2            | Low lymphocytes  | Definite            |
| 01126            | 2            | Day 57            | 2            | Low lymphocytes  | Definite            |

**Table S5. T cell response against hIi.**Values of IFN- $\gamma$  ELISpot response against human Ii over time.

|             | baseline         |            | d14<br>2w post prime |            | d28<br>4w post prime |            | d63<br>4w post boost |            |
|-------------|------------------|------------|----------------------|------------|----------------------|------------|----------------------|------------|
|             | <i>DMSO (3X)</i> | <i>hIi</i> | <i>DMSO (3X)</i>     | <i>hIi</i> | <i>DMSO (3X)</i>     | <i>hIi</i> | <i>DMSO (3X)</i>     | <i>hIi</i> |
| PEA03-01117 | 5 (15)           | 1          | 2 (6)                | 1          | 3 (9)                | 1          | 5 (15)               | 2          |
| PEA03-01113 | 13 (39)          | 5          | 0                    | 1          | 0                    | 2          | 0                    | 8          |
| PEA03-01114 | 2 (6)            | 1          | 13 (39)              | 1          | 0                    | 7          | na                   | na         |
| PEA03-01115 | 5 (15)           | 4          | 2 (6)                | 1          | 0                    | 2          | 0                    | 5          |
| PEA03-01118 | 62 (186)         | 75         | 8 (24)               | 33         | 28 (84)              | 65         | 20 (60)              | 22         |
| PEA03-01119 | 12 (36)          | 11         | 2 (6)                | 6          | 28 (84)              | 10         | 5 (15)               | 3          |
| PEA03-01116 | 2 (6)            | 13         | 10 (30)              | 5          | 13 (39)              | 12         | 18 (54)              | 17         |
| PEA03-01120 | 0                | 3          | 8 (24)               | 8          | 8 (24)               | 3          | 3 (9)                | 8          |
| PEA03-01122 | 5 (15)           | 4          | 13 (39)              | 10         | 0                    | 13         | 35 (105)             | 0          |
| PEA03-01125 | 3 (9)            | 0          | 0                    | 0          | 3 (9)                | 8          | 3 (9)                | 4          |
| PEA03-01126 | 5 (15)           | 2          | 3 (9)                | 4          | 3 (9)                | 1          | 3 (9)                | 6          |

**Table S6. List of MHC class I and MHC class II multimers.**

(A-B) List of MHC class I pentamers and MHC class II multimers encoding immunodominant epitopes on NS region restricted for specific Human leukocyte antigen (HLA) type. Assigned class I pentamer and class II tetramer number (N), sequence and HLA specificity and evidences supporting tetramer functionality.

**A**

| N    | Protein | Position  | Peptide Sequence | HLA restriction | Supporting Sequence               |
|------|---------|-----------|------------------|-----------------|-----------------------------------|
| 103a | NS3     | 1435-1443 | ATDALMTGY        | A*0101          | Swadling et al, 2014<br>Proimmune |
| 95a  | NS3     | 1406-1415 | KLSALGINAV       | A*0201          | Swadling et al, 2014<br>Proimmune |

**B**

| N  | Protein | Position  | Peptide Sequence      | HLA restriction | Supporting Sequence                                                                                                            |
|----|---------|-----------|-----------------------|-----------------|--------------------------------------------------------------------------------------------------------------------------------|
| 14 | NS4b    | 1806-1818 | TLLFNILGGWVAA         | DRB1*0101       | Schulze zur Wiesch et al, 2012<br>Lucas et al, 2007<br>Gerlach et al, 2005                                                     |
| 15 | NS3     | 1248-1262 | GYKVLVLPNSVAATL       | DRB1*0401       | Schulze zur Wiesch et al, 2012<br>Ulsenheimer et al, 2006<br>Gerlach et al, 2005<br>Schulze zur Wiesch et al, 2005<br>Day 2002 |
| 17 | NS3     | 1582-1597 | NFPYLVAYQATVCARA      | DRB1*1501       | Schulze zur Wiesch et al, 2012<br>Gerlach et al, 2005<br>Schulze zur Wiesch et al, 2005                                        |
| 18 | NS3     | 1411-1425 | GINAVAYRGLDVSV        | DRB1*1501       | Schulze zur Wiesch et al, 2012<br>Gerlach et al, 2005<br>Schulze zur Wiesch et al, 2005                                        |
| 19 | NS3     | 1535-1551 | TTVRLRAYMNTPLPVC      | DRB1*1501       | Gerlach et al, 2005<br>Schulze zur Wiesch et al, 2005                                                                          |
| 20 | NS4b    | 1771-1790 | SGIQYLAGLSTLPGNPAIASL | DRB1*0401       | Schulze zur Wiesch et al, 2005                                                                                                 |
| 21 | NS4b    | 1773-1790 | QYLAGLSTLPGNPAIASL    | DRB1*0404       | Schulze zur Wiesch et al, 2012<br>Gerlach et al, 2005<br>Schulze zur Wiesch et al, 2005                                        |
| 22 | NS2     | 794-810   | WPLLLLLLALPQRAYAQ     | DRB1*0701       | Commercially available-NIH                                                                                                     |
| 24 | NS3     | 1535-1551 | TTVRLRAYMNTPLPVC      | DRB1*0701       | Gerlach et al, 2005<br>Schulze zur Wiesch et al, 2005                                                                          |
| 25 | NSSb    | 66-81     | VYYLTRDPTPLARAA       | DRB1*0301       | Proimmune                                                                                                                      |
| 29 | NSSa    | 1957-1975 | SLTITSLRRHNWITSCS     | DRB1*0701       | Commercially available-NIH                                                                                                     |

**Table S7. HLA typing of volunteers vaccinated with ChAd3/MVA with and without Ii and assigned class I and class II multimers.**

HLA typing for volunteers vaccinated with ChAd3/MVA-hIiNSmut (**A**) and with ChAd3/MVA-NSmut (**B**).

**A**

| N           | Protein  | Allele | Allele | Class I pentamer | Class II tetramer |
|-------------|----------|--------|--------|------------------|-------------------|
| PEA03-01113 | HLA-A    | 26:01  | 02:01  | 95a              | 14                |
|             | HLA-B    | 38:01  | 15:01  |                  |                   |
|             | HLA-C    | 12:01  | 01:02  |                  |                   |
|             | HLA-DRB1 | 01:03  | 13:01  |                  |                   |
|             | HLA-DRB3 | 01:01  | -      |                  |                   |
|             | HLA-DRB4 | -      | -      |                  |                   |
|             | HLA-DRB5 | -      | -      |                  |                   |
|             | HLA-DQB1 | 05:01  | 06:02  |                  |                   |
| PEA03-01115 | HLA-A    | 24:02  | 11:01  | -                | -                 |
|             | HLA-B    | 18:01  | 51:01  |                  |                   |
|             | HLA-C    | 07:02  | 12:03  |                  |                   |
|             | HLA-DRB1 | 11:01  | -      |                  |                   |
|             | HLA-DRB3 | 02:01  | -      |                  |                   |
|             | HLA-DRB4 | -      | -      |                  |                   |
|             | HLA-DRB5 | -      | -      |                  |                   |
|             | HLA-DQB1 | 03:01  | -      |                  |                   |
| PEA03-01116 | HLA-A    | 03:01  | 02:01  | 95a              | -                 |
|             | HLA-B    | 14:02  | 07:02  |                  |                   |
|             | HLA-C    | 08:02  | 07:02  |                  |                   |
|             | HLA-DRB1 | 09:01  | 13:01  |                  |                   |
|             | HLA-DRB3 | 01:07  | -      |                  |                   |
|             | HLA-DRB4 | 01:01  | -      |                  |                   |
|             | HLA-DRB5 | -      | -      |                  |                   |
|             | HLA-DQB1 | 06:02  | 03:03  |                  |                   |
| PEA03-01117 | HLA-A    | 29:01  | 02:01  | 95a              | 14                |
|             | HLA-B    | 14:02  | 44:03  |                  |                   |
|             | HLA-C    | 16:01  | 08:01  |                  |                   |
|             | HLA-DRB1 | 01:01  | 03:01  |                  |                   |
|             | HLA-DRB3 | 02:01  | -      |                  |                   |
|             | HLA-DRB4 | -      | -      |                  |                   |
|             | HLA-DRB5 | -      | -      |                  |                   |
|             | HLA-DQB1 | 02:01  | 05:01  |                  |                   |
| PEA03-01118 | HLA-A    | 29:01  | 03:01  | -                | 24                |
|             | HLA-B    | 14:02  | 44:03  |                  |                   |
|             | HLA-C    | 16:01  | 08:02  |                  |                   |
|             | HLA-DRB1 | 07:01  | 13:02  |                  |                   |
|             | HLA-DRB3 | 02:09  | -      |                  |                   |
|             | HLA-DRB4 | 01:01  | -      |                  |                   |
|             | HLA-DRB5 | -      | -      |                  |                   |
|             | HLA-DQB1 | 02:01  | 06:03  |                  |                   |
| PEA03-01119 | HLA-A    | 02:01  | 24:02  | 95a              | 17,18,19          |
|             | HLA-B    | 07:02  | -      |                  |                   |
|             | HLA-C    | 07:02  | -      |                  |                   |
|             | HLA-DRB1 | 08:03  | 15:01  |                  |                   |
|             | HLA-DRB3 | -      | -      |                  |                   |
|             | HLA-DRB4 | -      | -      |                  |                   |
|             | HLA-DRB5 | 01:01  | -      |                  |                   |
|             | HLA-DQB1 | 03:01  | 06:02  |                  |                   |
| PEA03-01120 | HLA-A    | 33:03  | 01:01  | 103a             | -                 |
|             | HLA-B    | 35:01  | 08:01  |                  |                   |
|             | HLA-C    | 07:01  | 12:03  |                  |                   |
|             | HLA-DRB1 | 14:01  | 03:01  |                  |                   |
|             | HLA-DRB3 | 02:01  | 01:01  |                  |                   |
|             | HLA-DRB4 | -      | -      |                  |                   |
|             | HLA-DRB5 | -      | -      |                  |                   |
|             | HLA-DQB1 | 02:01  | 05:01  |                  |                   |
| PEA03-01122 | HLA-A    | 01:01  | 26:01  | 103a             | -14               |
|             | HLA-B    | 49:01  | 08:01  |                  |                   |
|             | HLA-C    | 07:01  | -      |                  |                   |
|             | HLA-DRB1 | 01:01  | 03:01  |                  |                   |
|             | HLA-DRB3 | 01:01  | -      |                  |                   |
|             | HLA-DRB4 | -      | -      |                  |                   |
|             | HLA-DRB5 | -      | -      |                  |                   |
|             | HLA-DQB1 | 02:01  | 05:01  |                  |                   |
| PEA03-01125 | HLA-A    | 01:01  | 24:02  | 103a             | -                 |
|             | HLA-B    | 44:02  | 08:01  |                  |                   |
|             | HLA-C    | 05:01  | 07:01  |                  |                   |
|             | HLA-DRB1 | 11:01  | 03:01  |                  |                   |
|             | HLA-DRB3 | 02:01+ | 01:01  |                  |                   |
|             | HLA-DRB4 | -      | -      |                  |                   |
|             | HLA-DRB5 | -      | -      |                  |                   |
|             | HLA-DQB1 | 02:01  | 03:01  |                  |                   |
| PEA03-01126 | HLA-A    | 03:01  | 02:01  | 95a              | 15,20,21          |
|             | HLA-B    | 14:02  | 44:02  |                  |                   |
|             | HLA-C    | 05:01  | 08:02  |                  |                   |
|             | HLA-DRB1 | 04:01  | 13:02  |                  |                   |
|             | HLA-DRB3 | 03:01  | -      |                  |                   |
|             | HLA-DRB4 | 01:01  | -      |                  |                   |
|             | HLA-DRB5 | -      | -      |                  |                   |
|             | HLA-DQB1 | 06:03  | 03:01  |                  |                   |



# B

| N         | Protein  | Allele | Allele | Class I pentamer | Class II tetramer |
|-----------|----------|--------|--------|------------------|-------------------|
| PEA04-004 | HLA-A    | 02:01  | 01:01  | 103a /95a        | -                 |
|           | HLA-B    | 49:01  | 45:01  |                  |                   |
|           | HLA-C    | 06:02  | 07:01  |                  |                   |
|           | HLA-DRB1 | 11:02  | -      |                  |                   |
|           | HLA-DRB3 | 02:01  | -      |                  |                   |
|           | HLA-DRB4 | -      | -      |                  |                   |
|           | HLA-DRB5 | -      | -      |                  |                   |
|           | HLA-DQB1 | 03:01  | -      |                  |                   |
| PEA04-005 | HLA-A    | 11:01  | 01:01  | 103a             |                   |
|           | HLA-B    | 45:01  | 57:01  |                  |                   |
|           | HLA-C    | 03:03  | 06:02  |                  |                   |
|           | HLA-DRB1 | 07:01  | -      |                  |                   |
|           | HLA-DRB3 | -      | -      |                  |                   |
|           | HLA-DRB4 | 01:03  | 01:01  |                  |                   |
|           | HLA-DRB5 | -      | -      |                  |                   |
|           | HLA-DQB1 | 03:03  | 02:01  |                  |                   |
| PEA04-006 | HLA-A    | 01:01  | -      | 103a             | -                 |
|           | HLA-B    | 08:01  | -      |                  |                   |
|           | HLA-C    | 07:01  | -      |                  |                   |
|           | HLA-DRB1 | 11:01  | 03:01  |                  |                   |
|           | HLA-DRB3 | 02:01  | 01:01  |                  |                   |
|           | HLA-DRB4 | -      | -      |                  |                   |
|           | HLA-DRB5 | -      | -      |                  |                   |
|           | HLA-DQB1 | 02:01  | 03:01  |                  |                   |
| PEA04-009 | HLA-A    | 29:01  | 03:01  | -                | 14                |
|           | HLA-B    | 35:03  | 14:02  |                  |                   |
|           | HLA-C    | 08:02  | 04:01  |                  |                   |
|           | HLA-DRB1 | 01:02  | 12:01  |                  |                   |
|           | HLA-DRB3 | 02:01  | -      |                  |                   |
|           | HLA-DRB4 | -      | -      |                  |                   |
|           | HLA-DRB5 | -      | -      |                  |                   |
|           | HLA-DQB1 | 03:01  | 05:01  |                  |                   |
| PEA04-011 | HLA-A    | 23:01  | 25:01  | -                | 17,18,19          |
|           | HLA-B    | 52:01  | 18:01  |                  |                   |
|           | HLA-C    | 12:03  | 12:02  |                  |                   |
|           | HLA-DRB1 | 15:01  | -      |                  |                   |
|           | HLA-DRB3 | 02:01  | -      |                  |                   |
|           | HLA-DRB4 | -      | -      |                  |                   |
|           | HLA-DRB5 | 01:01  | -      |                  |                   |
|           | HLA-DQB1 | 06:02  | 06:01  |                  |                   |
| PEA04-014 | HLA-A    | 30:01  | 02:01  | 95a              | 17,18,19-         |
|           | HLA-B    | 42:01  | 57:01  |                  |                   |
|           | HLA-C    | 07:01  | 17:01  |                  |                   |
|           | HLA-DRB1 | 15:01  | 11:02  |                  |                   |
|           | HLA-DRB3 | 02:01  | -      |                  |                   |
|           | HLA-DRB4 | -      | -      |                  |                   |
|           | HLA-DRB5 | 01:01  | -      |                  |                   |
|           | HLA-DQB1 | 03:01  | 06:02  |                  |                   |
| PEA04-028 | HLA-A    | 32:01  | 03:01  | -                | 17,18,19          |
|           | HLA-B    | 14:01  | 15:01  |                  |                   |
|           | HLA-C    | 08:02  | 03:04  |                  |                   |
|           | HLA-DRB1 | 07:01  | 15:01  |                  |                   |
|           | HLA-DRB3 | -      | -      |                  |                   |
|           | HLA-DRB4 | 01:01  | -      |                  |                   |
|           | HLA-DRB5 | 01:01  | -      |                  |                   |
|           | HLA-DQB1 | 02:01  | 06:02  |                  |                   |

**Table S8. List of antibodies and markers used in FACS staining panel.**

| <b>ICS staining</b>                   |                     |                  |              |                     |
|---------------------------------------|---------------------|------------------|--------------|---------------------|
| <b>Antibody</b>                       | <b>Fluorochrome</b> | <b>Origin</b>    | <b>Clone</b> | <b>Brand</b>        |
| Live Dead                             | Aqua                |                  |              | Invitrogen          |
| TNF $\alpha$                          | FITC                | mouse anti human |              | BD Bioscience       |
| CD4                                   | PE/Dazzle 594       | anti human       | RAP-T4       | Biolegend           |
| CD8                                   | PerCP/Cy5.5         | anti human       | RPA-T8       | Biolegend           |
| CD154                                 | Pe-Cy7              | anti human       | 24-31        | Biolegend           |
| CD107a                                | BV421               | mouse anti human | H4A3         | BD Bioscience       |
| CD3                                   | APC/Fire 750        | anti human       | SK7          | Biolegend           |
| IFN- $\gamma$                         | APC                 | mouse anti human |              | BD Bioscience       |
| IL-2                                  | PE                  | anti human       | MQ1-17H12    | Biolegend           |
| <b>MHC Class I pentamer staining</b>  |                     |                  |              |                     |
| <b>Antibody</b>                       | <b>Fluorochrome</b> | <b>Origin</b>    | <b>Clone</b> | <b>Brand</b>        |
| Live dead                             | NIR                 |                  |              | Invitrogen          |
| CD3                                   | PO                  | anti human       |              | Invitrogen          |
| CD127                                 | APC                 | anti human       |              | Mac Myltheny Biotec |
| Eomes                                 | eFluor660           | anti human       | WD1928       | Invitrogen          |
| CD8                                   | PB                  | mouse anti human | RPA-T8       | BD Bioscience       |
| Perforin                              | FITC                | mouse anti human |              | BD Bioscience       |
| T bet                                 | BV605               | anti human       | 4B10         | Biolegend           |
| CD45RA                                | FITC                | mouse anti human | HI100        | BD Bioscience       |
| HLA-DR                                | Alexa fluor 700     | anti human       | G46-6        | BD Bioscience       |
| CD38                                  | PerCP/Cy5.5         | anti human       | HIT-2        | Biolegend           |
| GzA                                   | PerCP/Cy5.5         | anti human       | CB9          | Biolegend           |
| CCR7 (CD197)                          | Pe-Cy7              | rat anti human   |              | BD Bioscience       |
| GzB                                   | Alexa fluor 700     | mouse anti human | GB11         | BD Bioscience       |
| CD279(PD1)                            | Pe-Cy7              | mouse anti human | EH12.1       | BD Bioscience       |
| <b>MHC Class II tetramer staining</b> |                     |                  |              |                     |
| <b>Antibody</b>                       | <b>Fluorochrome</b> | <b>Origin</b>    | <b>Clone</b> | <b>Brand</b>        |
| CD4                                   | Alexa fluor 700     | mouse anti human | RPA-T4       | BD Bioscience       |
| CD3                                   | BV570               | anti human       | UCHT1        | Biolegend           |
| CD127 (IL-7R $\alpha$ )               | PB                  | anti human       | A019D5       | Biolegend           |
| CD28                                  | PerCP/Cy5.5         | anti human       | CD28.2       | eBioscience         |
| CD45RA                                | APC                 | anti human       | HI100        | Biolegend           |
| CD57                                  | FITC                | anti human       | HNK-1        | Biolegend           |
| CD14                                  | APC-Cy7             | anti human       | HCD14        | Biolegend           |
| CD19                                  | APC-Cy7             | anti human       | HIB19        | Biolegend           |
| <b>Cell proliferation assay</b>       |                     |                  |              |                     |
| <b>Antibody</b>                       | <b>Fluorochrome</b> | <b>Origin</b>    | <b>Clone</b> | <b>Brand</b>        |
| CD3                                   | FITC                | anti human       | UCHT1        | Biolegend           |
| CD8                                   | Pe-Cy7              | mouse anti human | RPA-T8       | BD Bioscience       |
| CD4                                   | Alexa fluor 700     | mouse anti human | RPA-T4       | BD Bioscience       |
| Cell trace Violet                     | Pacific Blue        |                  |              | Invitrogen          |
| Live dead                             | NIR                 |                  |              | Invitrogen          |
